# Supplementary material for: Synthesis and characterization of poly(glycerol sebacate)-based elastomeric copolyesters for tissue engineering applications
Source: Royal Society of Chemistry journal article supplement (doi:10.1039/c5py01993a), 2016-01-01
Supplement: c5py01993a1.pdf [file c5py01993a1.pdf]

**Supporting Information**

**Synthesis and characterization of poly(glycerol sebacate)-  
based elastomeric copolyesters for tissue engineering  
applications**

*Yating Jia,<sup>a</sup> Weizhong Wang,<sup>a</sup> Xiaojun Zhou,<sup>a,b</sup> Wei Nie,<sup>a</sup> Liang Chen<sup>a</sup> and*

*Chuanglong He<sup>\*a,b</sup>*

<sup>a</sup>College of Chemistry, Chemical Engineering and Biotechnology, Donghua University, Shanghai 201620, China.

<sup>b</sup>State Key Laboratory for Modification of Chemical Fibers and Polymer Materials, Donghua University, Shanghai 201620, China.

\*Corresponding author.

Professor Chuanglong He

College of Chemistry, Chemical Engineering and Biotechnology, Donghua University, 2999 North Renmin Road, Shanghai 201620, China.

Tel. /fax: +86 21 6779 2742

Email address: hcl@dhu.edu.cn (C.L He)

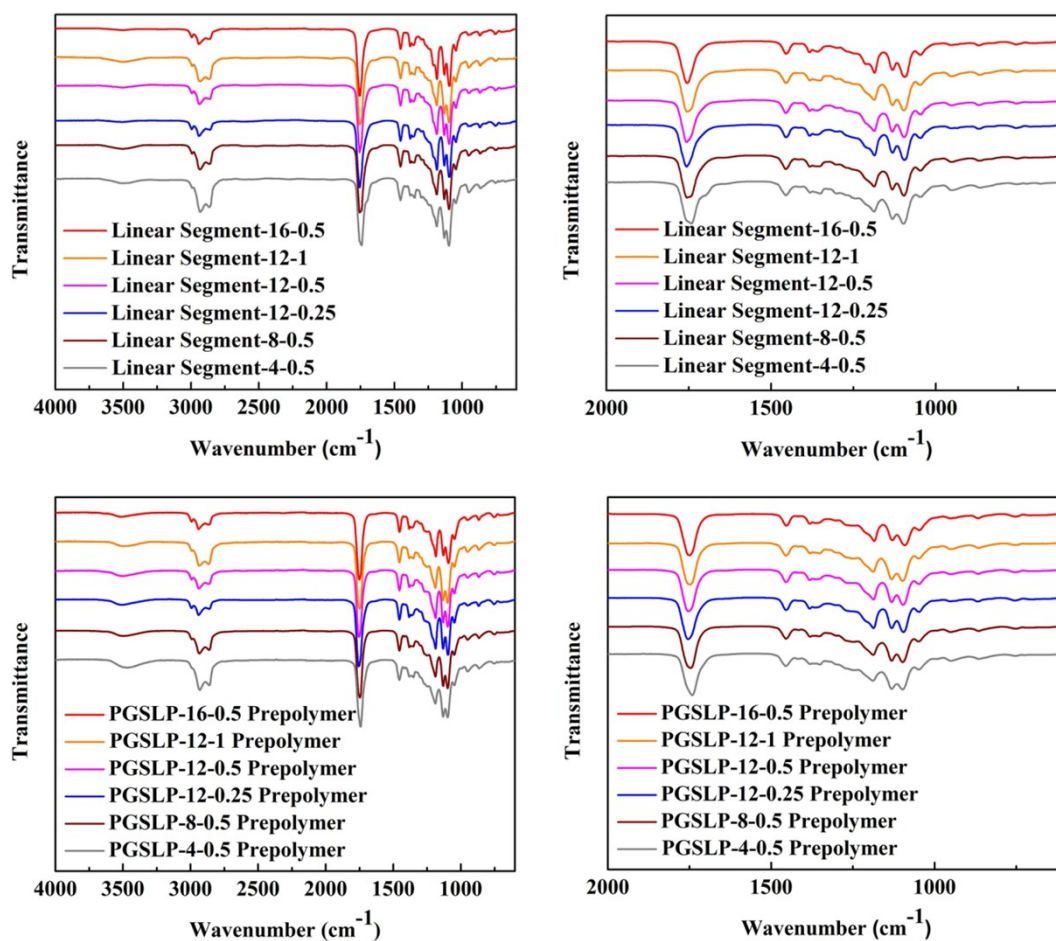

**Fig. S1** FTIR spectra of linear segments and PGSLP pre-polymer.

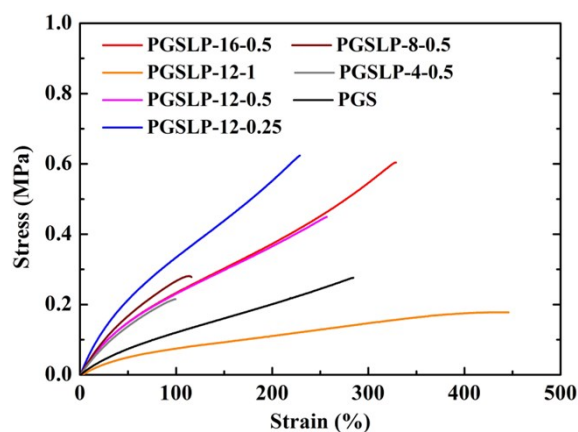

**Fig. S2** Tensile stress-strain curves of the gels of PGS and PGSLP. PGS was cured at 120 °C for 60 h and PGSLP were cured at 150 °C for 48 h (PGSLP-12-1 cured for 72 h).

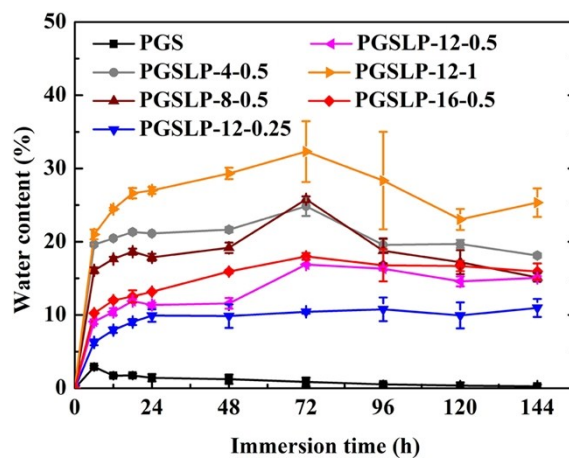

**Fig. S3** The kinetics of hydration process of PGS and PGSLP in PBS solution. PGSLP were cured at 150 °C for 48 h (PGSLP-12-1 cured for 72 h).

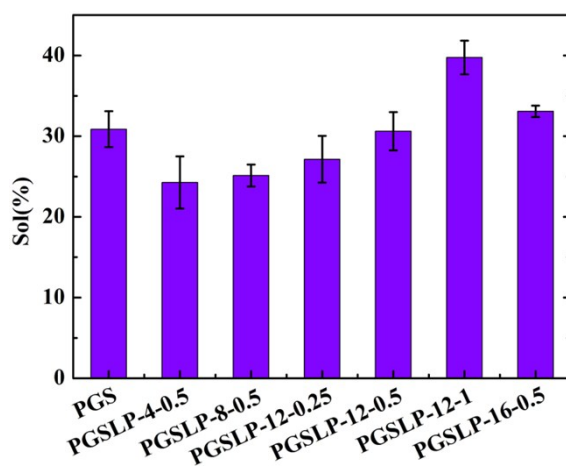

**Fig. S4** Sol gel analysis of PGS and PGSLP. PGS was cured at 120 °C for 60 h and PGSLP were cured at 150 °C for 48 h (PGSLP-12-1 cured for 72 h).

**Table S1**

The molecular weights of linear segments, PGS pre-polymer and PGSLP pre-polymers determined by gel permeation chromatography (GPC).

| sample                    | Theoretical $M_n$<br>(kDa) | GPC data       |                |       |
|---------------------------|----------------------------|----------------|----------------|-------|
|                           |                            | $M_n$<br>(kDa) | $M_w$<br>(kDa) | $D_n$ |
| Linear segment-4-0.5      | 2.043                      | 2.296          | 2.778          | 1.21  |
| Linear segment-8-0.5      | 2.084                      | 2.048          | 2.428          | 1.19  |
| Linear segment-12-0.25    | 1.683                      | 3.536          | 3.987          | 1.13  |
| Linear segment-12-0.5     | 1.483                      | 2.374          | 3.252          | 1.37  |
| Linear segment-12-1       | 1.323                      | 2.088          | 2.321          | 1.11  |
| Linear segment-16-0.5     | 0.963                      | 2.907          | 3.394          | 1.17  |
| PGS pre-polymer           | -                          | 9.266          | 10.959         | 1.18  |
| PGSLP-4-0.5 pre-polymer   | -                          | 8.655          | 9.682          | 1.12  |
| PGSLP-8-0.5 pre-polymer   | -                          | 10.214         | 11.278         | 1.10  |
| PGSLP-12-0.25 pre-polymer | -                          | 8.679          | 9.721          | 1.12  |
| PGSLP-12-0.5 pre-polymer  | -                          | 6.954          | 8.074          | 1.16  |
| PGSLP-12-1 pre-polymer    | -                          | 8.641          | 9.669          | 1.08  |
| PGSLP-16-0.5 pre-polymer  | -                          | 8.015          | 11.594         | 1.22  |

**Table S2**

Molar ratio of LLA:S:PEG in the linear segments and PGSLP pre-polymers.

| sample                    | NMR ratio    | Theoretical ratio |
|---------------------------|--------------|-------------------|
| Linear segment-4-0.5      | 7.70:2.65:1  | 8:3:1             |
| PGSLP-4-0.5 pre-polymer   | 6.92:2.87:1  |                   |
| Linear segment-8-0.5      | 14.70:2.98:1 | 16:3:1            |
| PGSLP-8-0.5 pre-polymer   | 13.70:2.91:1 |                   |
| Linear segment-12-0.25    | 45.09:4.87:1 | 48:5:1            |
| PGSLP-12-0.25 pre-polymer | 42.84:4.63:1 |                   |
| Linear segment-12-0.5     | 21.29:2.85:1 | 24:3:1            |
| PGSLP-12-0.5 pre-polymer  | 20.64:2.84:1 |                   |
| Linear segment-12-1       | 11.93:1.96:1 | 12:2:1            |
| PGSLP12-1 pre-polymer     | 11.19:1.99:1 |                   |
| Linear segment-16-0.5     | 30.25:3.02:1 | 32:3:1            |
| PGSLP-16-0.5 pre-polymer  | 27.67:2.87:1 |                   |

The peaks from glycerol partially overlap with that of PEG and LLA at  $\delta$  3.62 and 5.09-5.18 ppm in the  $^1\text{H}$  NMR spectrum of PGSLP pre-polymers, which had been eliminated.
